# Supplementary material for: A temperature- and stress-controlled failure criterion for ice-filled permafrost rock joints
Source: Copernicus journal article supplement (doi:10.5194/tc-12-3333-2018), 2018-10-17
Supplement: Supplementary file 2 [file tc-12-3333-2018-supplement.zip]

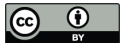

## *Supplement of*

# **A temperature- and stress-controlled failure criterion for ice-filled permafrost rock joints**

**Philipp Mamot et al.**

*Correspondence to:* Philipp Mamot ([philipp.mamot@tum.de](mailto:philipp.mamot@tum.de))

- tc-12-3333-2018-supplement-title-page.pdf
- Supplement
  - Supplement\_Mamot et al.docx
  - Supplement\_Mamot et al.pdf
  - data\_acoustic\_pdf\_Fig. S4.xlsx
  - data\_experiments.xlsx
  - data\_frictioncoeff\_cohesion\_Fig. 8.xlsx
  - data\_timeseries\_acoustic\_exp1b\_WSK\_spec4\_Fig. S3.xlsx
  - data\_timeseries\_acoustic\_exp2b\_WSK\_spec3\_Fig. S3.xlsx
  - data\_timeseries\_acoustic\_exp3b\_WSK\_spec3\_Fig. S3.xlsx
  - data\_timeseries\_acoustic\_exp5b\_WSK\_spec2\_Fig. S3.xlsx
  - data\_timeseries\_acoustic\_exp5c\_WSK\_spec1\_Fig. 5.xlsx
  - data\_timeseries\_acoustic\_exp5c\_WSK\_spec2\_Fig. 5.xlsx
  - data\_timeseries\_acoustic\_exp5c\_WSK\_spec3\_Fig. 5.xlsx
  - data\_timeseries\_acoustic\_exp5c\_WSK\_spec4\_Fig. 5.xlsx
  - data\_timeseries\_acoustic\_exp6b\_Fig. 4.xlsx
  - data\_timeseries\_acoustic\_exp6b\_WSK\_spec1\_Fig. S3.xlsx
  - data\_timeseries\_acoustic\_exp7b\_WSK\_spec2\_Fig. S3.xlsx
  - data\_timeseries\_shearmachine\_exp1b\_WSK\_spec4\_Fig. S3.xlsx
  - data\_timeseries\_shearmachine\_exp2b\_WSK\_spec3\_Fig. S3.xlsx
  - data\_timeseries\_shearmachine\_exp3b\_WSK\_spec3\_Fig. S3.xlsx
  - data\_timeseries\_shearmachine\_exp5b\_WSK\_spec2\_Fig. S3.xlsx
  - data\_timeseries\_shearmachine\_exp6b\_Fig. 4.xlsx
  - data\_timeseries\_shearmachine\_exp6b\_WSK\_spec1\_Fig. S3.xlsx
  - data\_timeseries\_shearmachine\_exp7b\_WSK\_spec2\_Fig. S3.xlsx

The copyright of individual parts of the supplement might differ from the CC BY 4.0 License.
